# Supplementary material
Source: publisher site journal article supplement (https://www.spandidos-publications.com/5234/downloadSupplementary)
Supplement: Supplementary file 1 [file downloadSupplementary]

## Sheet: Table SIII
Table SIII. Comparison of peak area values of UMOD peptides between low- (Gleason score 6) and high-grade (Gleason score >6) tumors.
Peptide	Sequence	P-valuea
UMOD-P1	DQSRVLNLGPITR	0.1813
UMOD-P2	IDQSRVLNLGPITR	0.5518
UMOD-P3	QSRVLNLGPITR	0.3526
UMOD-P4	SGSVIDQSRVLNLGPITR	0.3526
UMOD-P5	SGSVIDQSRVLNLGPITRK	0.73
aMann-Whitney non-parametric test.
